# Supplementary material
Source: PubMed Central journal article supplement (PMC2891539)
Supplement: NIHMS210549-supplement-Supplementary_Tables_1_and_2.pdf [file NIHMS210549-supplement-Supplementary_Tables_1_and_2.pdf]

**Supplementary Table 1. Tabulation of Arg-Gua Interactions in Selected Protein-DNA Complexes.<sup>a</sup>**

| <b>PDBID</b>      | <b>Arg-Gua Total<sup>b</sup></b> | <b><u>all bidentate<sup>c</sup></u></b> | <b>bidentate involving N<sup>ε</sup>/N<sup>η2</sup><sup>d</sup></b> | <b>N<sup>ε</sup>-O6/N<sup>η2</sup>-N7 residue(s)<sup>e</sup></b> |
|-------------------|----------------------------------|-----------------------------------------|---------------------------------------------------------------------|------------------------------------------------------------------|
| 1A0A              | 2                                |                                         |                                                                     |                                                                  |
| 1A3Q              | 2                                | 2                                       |                                                                     |                                                                  |
| 1A73              | 1                                | 1                                       |                                                                     |                                                                  |
| 1AM9              | 1                                |                                         |                                                                     |                                                                  |
| 1AWC              | 2                                | 2                                       | 2                                                                   | 376                                                              |
| 1BC8              | 2                                | 2                                       | 2                                                                   | 61                                                               |
| 1BDT              | 1                                |                                         |                                                                     |                                                                  |
| 1BL0              | 2                                | 1                                       |                                                                     |                                                                  |
| 1CEZ              | 2                                | 2                                       |                                                                     |                                                                  |
| 1CF7              | 4                                | 1                                       | 1                                                                   | 56                                                               |
| 1D02              | 1                                | 1                                       | 1                                                                   | 115                                                              |
| 1DMU              | 2                                |                                         |                                                                     |                                                                  |
| 1DP7              | 1                                | 1                                       |                                                                     |                                                                  |
| 1DSZ              | 1                                |                                         |                                                                     |                                                                  |
| 1E3O              | 1                                | 1                                       |                                                                     |                                                                  |
| 1ECR              | 1                                |                                         |                                                                     |                                                                  |
| 1EFA              | 1                                |                                         |                                                                     |                                                                  |
| 1F44 <sup>f</sup> | 1                                | 1                                       | 1                                                                   | 259                                                              |
| 1F4K              | 1                                | 1                                       |                                                                     |                                                                  |
| 1FIU              | 3                                | 2                                       | 2                                                                   | 191, 194                                                         |
| 1FOK              | 2                                | 2                                       | 1                                                                   |                                                                  |
| 1G38              | 1                                |                                         |                                                                     |                                                                  |
| 1G9Z              | 4                                | 1                                       |                                                                     |                                                                  |
| 1GDT              | 1                                | 1                                       |                                                                     |                                                                  |
| 1GU4              | 1                                | 1                                       |                                                                     |                                                                  |
| 1GXP              | 2                                |                                         |                                                                     |                                                                  |
| 1H6F              | 1                                |                                         |                                                                     |                                                                  |
| 1H9D              | 3                                | 3                                       |                                                                     |                                                                  |
| 1HCR              | 1                                |                                         |                                                                     |                                                                  |
| 1HLV              | 1                                |                                         |                                                                     |                                                                  |
| 1HWT              | 1                                | 1                                       | 1                                                                   | 118                                                              |
| 1I7D              | 1                                | 1                                       | 1                                                                   |                                                                  |
| 1IAW              | 3                                | 2                                       | 1                                                                   |                                                                  |
| 1IGN              | 3                                | 2                                       |                                                                     |                                                                  |
| 1K78              | 3                                | 3                                       | 2                                                                   | 391                                                              |
| 1KU7              | 1                                | 1                                       | 1                                                                   |                                                                  |
| 1L3L              | 2                                | 1                                       |                                                                     |                                                                  |
| 1L3S              | 2                                |                                         |                                                                     |                                                                  |
| 1LLM              | 2                                | 2                                       |                                                                     |                                                                  |

|                         |           |           |           |           |
|-------------------------|-----------|-----------|-----------|-----------|
| <b>1LQ1</b>             | 2         | 2         | 1         |           |
| <b>1M5R</b>             | 1         | 1         |           |           |
| <b>1MHD</b>             | 1         | 1         |           |           |
| <b>1MNN</b>             | 3         | 3         |           |           |
| <b>1NKP</b>             | 3         | 3         |           |           |
| <b>1NLW</b>             | 1         |           |           |           |
| <b>1P4E<sup>g</sup></b> | 1         | 1         | 1         | 281       |
| <b>1P7H</b>             | 2         | 2         |           |           |
| <b>1PUF</b>             | 1         | 1         |           |           |
| <b>1QPZ</b>             | 1         | 1         |           |           |
| <b>1REP</b>             | 3         | 1         |           |           |
| <b>1SKN</b>             | 1         | 1         |           |           |
| <b>1TC3</b>             | 1         | 1         |           |           |
| <b>1TRO</b>             | 1         | 1         |           |           |
| <b>1TUP</b>             | 1         | 1         |           |           |
| <b>1UBD</b>             | 1         | 1         |           |           |
| <b>2CGP</b>             | 2         |           |           |           |
| <b>2DRP</b>             | 2         | 2         |           |           |
| <b>2IRF</b>             | 1         |           |           |           |
| <b>2UP1</b>             | 1         |           |           |           |
| <b>6MHT</b>             | 1         | 1         |           |           |
| <b>proteins</b>         | <b>60</b> | <b>43</b> | <b>14</b> | <b>9</b>  |
| <b>residues</b>         | <b>98</b> | <b>63</b> | <b>18</b> | <b>10</b> |

### Legend for Supplementary Table 1

<sup>a</sup> Structure library described in Lejeune *et al.*, “Protein-nucleic acid recognition: statistical analysis of atomic interactions and influence on DNA structure.” *Proteins* 61, 258-71 (2005).

<sup>b</sup> Occurrences of at least one interaction 3.2 Å or closer between Arg N<sup>ε</sup>, N<sup>η1</sup>, or N<sup>η2</sup> and Gua O<sup>6</sup> or N<sup>7</sup> atoms in dsDNA.

<sup>c</sup> Occurrences of paired interactions involving any combination of Arg N<sup>ε</sup>, N<sup>η1</sup>, or N<sup>η2</sup> with Gua O<sup>6</sup> and N<sup>7</sup> atoms.

<sup>d</sup> Occurrences of paired interactions of Arg N<sup>ε</sup> and N<sup>η2</sup> with Gua O<sup>6</sup> and N<sup>7</sup> atoms, including both N<sup>ε</sup>-O6/N<sup>η2</sup>-N7 and N<sup>ε</sup>-N7/N<sup>η2</sup>-O6 paired hydrogen bonds.

<sup>e</sup> N<sup>ε</sup>-O6/N<sup>η2</sup>-N7 paired hydrogen bonds similar to Cre Arg259

<sup>f</sup> Cre recombinase

<sup>g</sup> FLP recombinase

**Supplementary Table 2. Tabulation of Carboxylate-Phosphate Interactions in Selected Protein-DNA Complexes.<sup>a</sup>**

| <b>PDBID</b>            | <b>Residue<sup>b</sup></b> | <b>Protein Description</b>                                |
|-------------------------|----------------------------|-----------------------------------------------------------|
| <b>1BL0</b>             | Glu31                      | MULTIPLE ANTIBIOTIC RESISTANCE PROTEIN (MARA)/DNA COMPLEX |
| <b>1CEZ</b>             | Asp242                     | T7 RNA POLYMERASE-T7 PROMOTER COMPLEX                     |
| <b>1F44<sup>c</sup></b> | Glu262                     | CRE RECOMBINASE TRIMER/DNA COMPLEX                        |
| <b>1FZP</b>             | Glu11                      | PLEIOTROPIC VIRULENCE REGULATOR SARA/DNA COMPLEX          |
| <b>1GXP</b>             | Glu291                     | PHOB EFFECTOR DOMAIN/PHO BOX DNA                          |
| <b>1N6Q</b>             | Glu449                     | HIV-1 REVERSE TRANSCRIPTASE/AZTMP-TERMINATED DNA          |

<sup>a</sup> Structure library described in Lejeune *et al.*, “Protein-nucleic acid recognition: statistical analysis of atomic interactions and influence on DNA structure.” *Proteins* 61, 258-71 (2005).

<sup>b</sup> Interatomic distances of 3.2 Å or closer between Glu or Asp side chain carboxylate oxygen atoms O<sup>δ1</sup>, O<sup>δ2</sup>, O<sup>ε1</sup> or O<sup>ε2</sup> and DNA nucleotide phosphate oxygen atoms O<sup>1P</sup> or O<sup>2P</sup> in dsDNA.

<sup>c</sup> Cre recombinase

**List of 139 selected PDB files from Lejeune *et al.*, “Protein-nucleic acid recognition: statistical analysis of atomic interactions and influence on DNA structure.” *Proteins* 61, 258-71 (2005).**

1A0A.pdb, 1A1V.pdb, 1A3Q.pdb, 1A73.pdb, 1AIS.pdb, 1AM9.pdb, 1AWC.pdb, 1B01.pdb, 1B3T.pdb, 1BC8.pdb, 1BDT.pdb, 1BG1.pdb, 1BL0.pdb, 1BPY.pdb, 1BRN.pdb, 1C8C.pdb, 1CEZ.pdb, 1CF7.pdb, 1CKT.pdb, 1CL8.pdb, 1CW0.pdb, 1D02.pdb, 1DC1.pdb, 1DDN.pdb, 1DEW.pdb, 1DFM.pdb, 1DH3.pdb, 1DIZ.pdb, 1DMU.pdb, 1DP7.pdb, 1DSZ.pdb, 1E3O.pdb, 1ECR.pdb, 1EFA.pdb, 1EGW.pdb, 1ESG.pdb, 1EWN.pdb, 1EWQ.pdb, 1EXJ.pdb, 1EYG.pdb, 1F0V.pdb, 1F44.pdb, 1F4K.pdb, 1FIU.pdb, 1FOK.pdb, 1FZP.pdb, 1G38.pdb, 1G9Z.pdb, 1GDT.pdb, 1GT0.pdb, 1GU4.pdb, 1GXP.pdb, 1H6F.pdb, 1H9D.pdb, 1HAO.pdb, 1HCR.pdb, 1HI0.pdb, 1HLV.pdb, 1HWT.pdb, 1I3J.pdb, 1I6J.pdb, 1I7D.pdb, 1I8M.pdb, 1IAW.pdb, 1IC8.pdb, 1IGN.pdb, 1J1V.pdb, 1J75.pdb, 1JB7.pdb, 1JE8.pdb, 1JEY.pdb, 1JFI.pdb, 1JJ4.pdb, 1JMC.pdb, 1JT0.pdb, 1JX4.pdb, 1K3X.pdb, 1K4T.pdb, 1K78.pdb, 1KC6.pdb, 1KDH.pdb, 1KU7.pdb, 1KX5.pdb, 1L3L.pdb, 1L3S.pdb, 1LLM.pdb, 1LMB.pdb, 1LQ1.pdb, 1LRR.pdb, 1LWY.pdb, 1M07.pdb, 1M5R.pdb, 1MHD.pdb, 1MJO.pdb, 1MNN.pdb, 1MUS.pdb, 1MW8.pdb, 1MWI.pdb, 1N6Q.pdb, 1NH2.pdb, 1NKP.pdb, 1NLW.pdb, 1NOY.pdb, 1ODH.pdb, 1OE4.pdb, 1ORN.pdb, 1OUP.pdb, 1P4E.pdb, 1P71.pdb, 1P7H.pdb, 1PUF.pdb, 1PV4.pdb, 1QNA.pdb, 1QPI.pdb, 1QPZ.pdb, 1QRV.pdb, 1QUM.pdb, 1R2Z.pdb, 1REP.pdb, 1SKN.pdb, 1T7P.pdb, 1TC3.pdb, 1TRO.pdb, 1TUP.pdb, 1UBD.pdb, 1VAS.pdb, 1ZME.pdb, 2BOP.pdb, 2BPA.pdb, 2CGP.pdb, 2DRP.pdb, 2HDD.pdb, 2IRF.pdb, 2PJR.pdb, 2UP1.pdb, 3HTS.pdb, 3PVI.pdb, 6CRO.pdb, 6MHT.pdb.
